# Supplementary material for: Inclusion complexes of norepinephrine with β-cyclodextrin, 18-crown-6 and cucurbit[7]uril: experimental and molecular dynamics study
Source: Royal Society of Chemistry journal article supplement (doi:10.1039/c6ra28638k), 2017-01-01
Supplement: c6ra28638k1.pdf [file c6ra28638k1.pdf]

## **Inclusion Complexes of Norepenephrine with $\beta$ -Cyclodextrin, 18-Crown-6 and Cucurbit[7]uril: Experimental and Molecular Dynamic Study**

Suad K. Al-Burtomani,<sup>a</sup> FakhrEldin O. Suliman<sup>a\*</sup>

<sup>a</sup> Department of Chemistry, College of Science, Sultan Qaboos University, Box 36, Al-Khod 123, Oman.

Corresponding author: Tel: +968-24141480. Fax: +968-24141469. Email address:  
[fsuliman@squ.edu.om](mailto:fsuliman@squ.edu.om).

**Supplementary information**

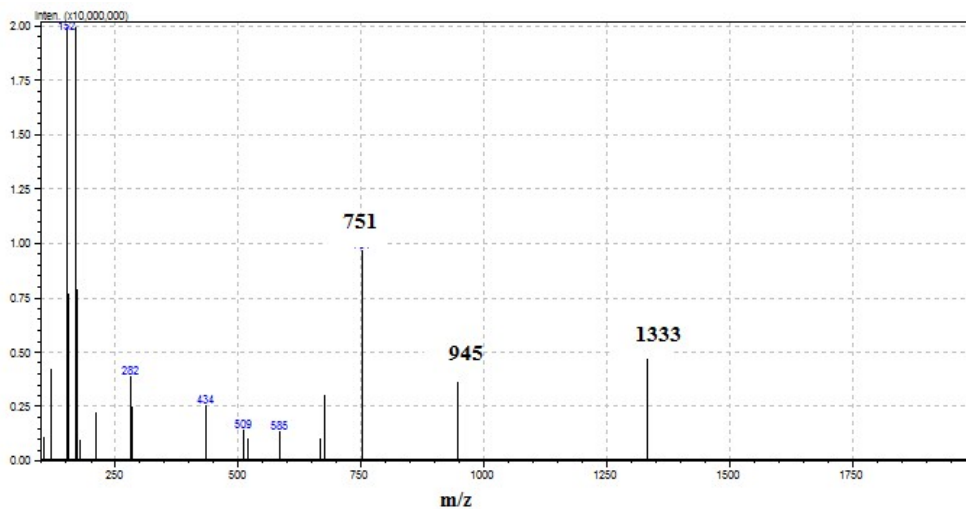

**Figure S1** ESI-MS Spectra of NP-CB7.

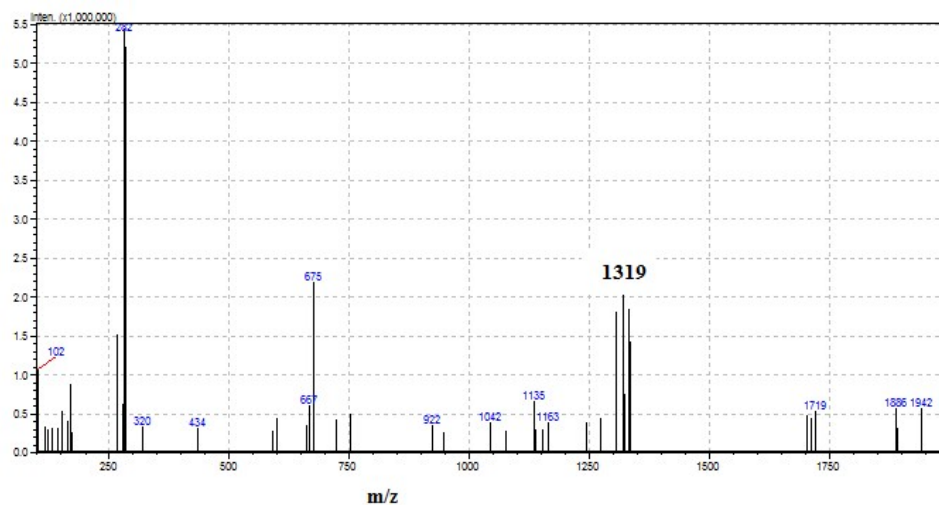

**Figure S2** ESI-MS Spectra of NP-CB7-βCD.

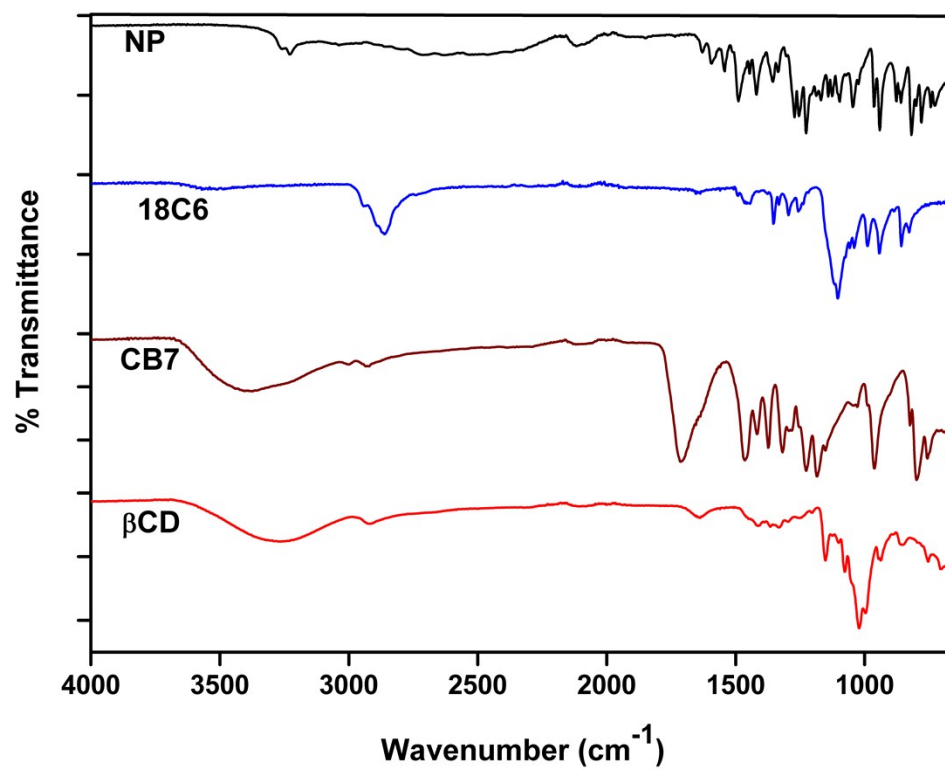

Figure S3 FT-IR spectra of pure substances.

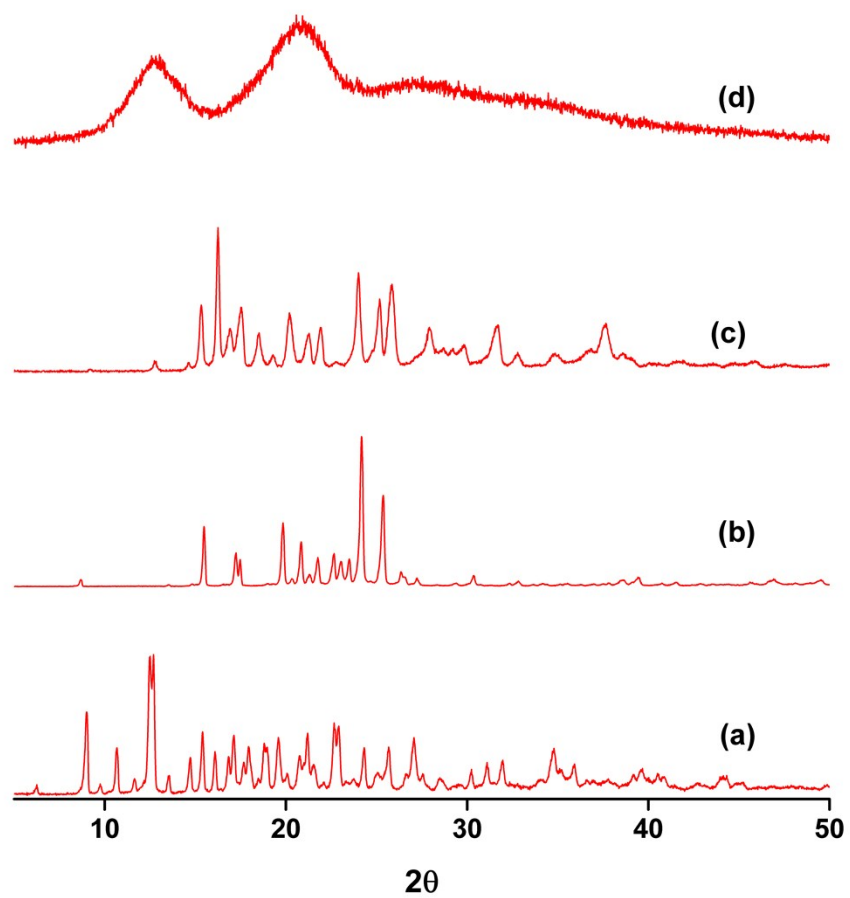

**Figure S4** PXRD patterns of (a)  $\beta$ CD (b) 18C6 (c) NP (d) CB7

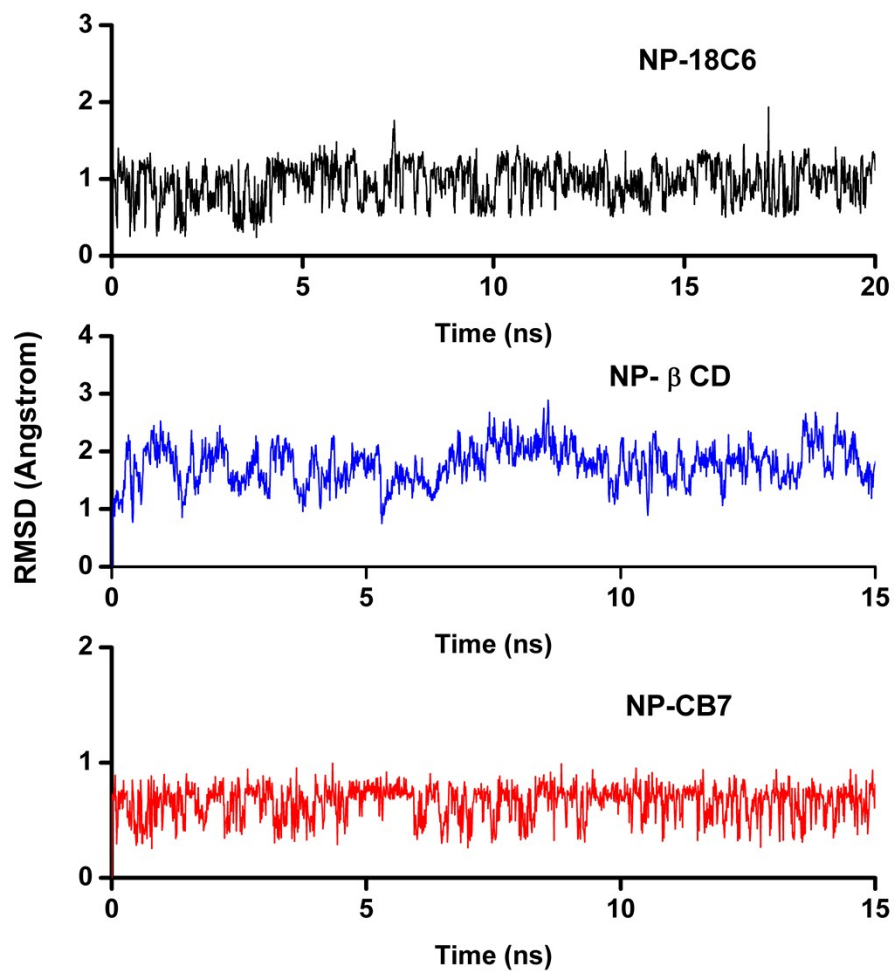

**Figure S5a** The time dependence of the root-mean-square deviations (RMSD) of atomic positions in the MD simulated binary complexes from those in the corresponding energy minimized structures.

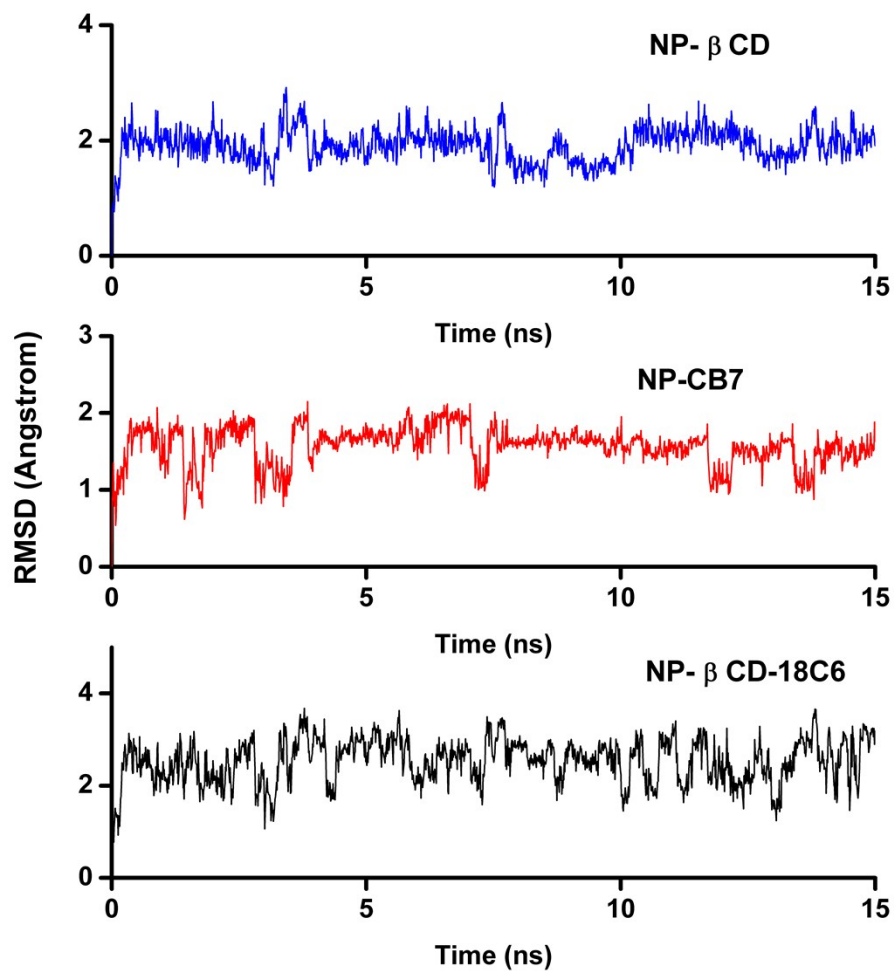

**Figure S5b** The time dependence of the root-mean-square deviations (RMSD) of atomic positions in the MD simulated ternary NP-βCD-18C6 complex from those in the corresponding energy minimized structure.

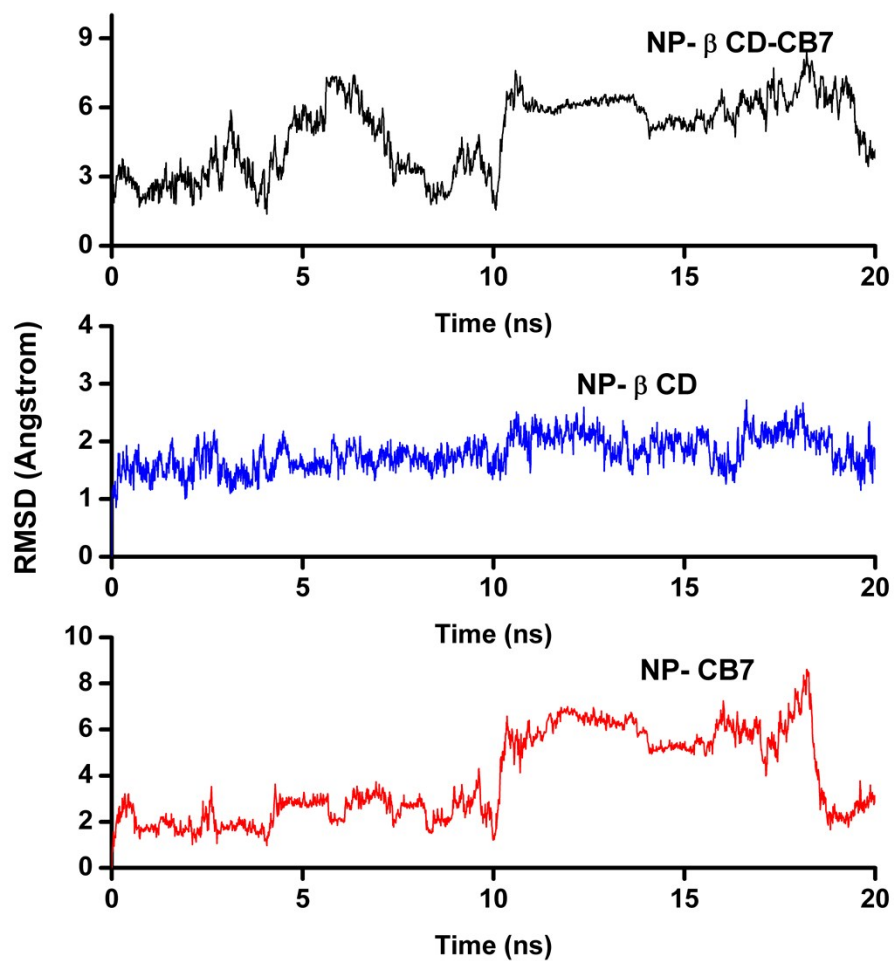

**Figure S5c** The time dependence of the root-mean-square deviations (RMSD) of atomic positions in the MD simulated ternary NP-βCD-CB7 complex from those in the corresponding energy minimized structure.

## Hydrogen Bonding Analysis

### (a) Binary complexes

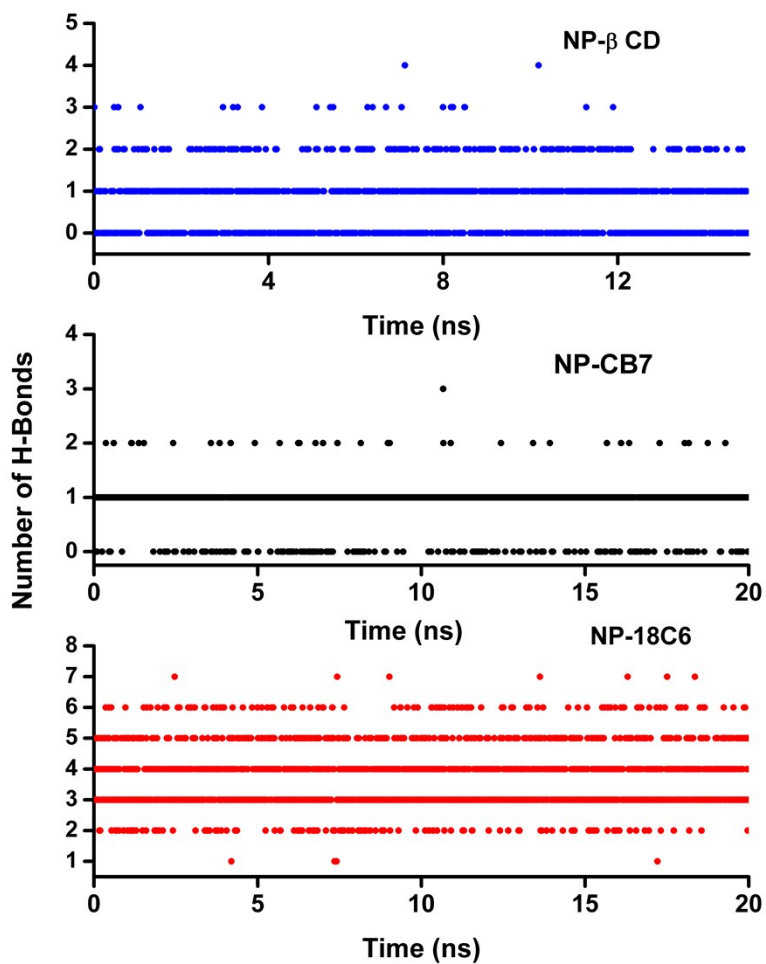

Figure S6a Hydrogen bonding interaction obtained from MD trajectories for binary complexes.



(b) NP- $\beta$ CD-18C6

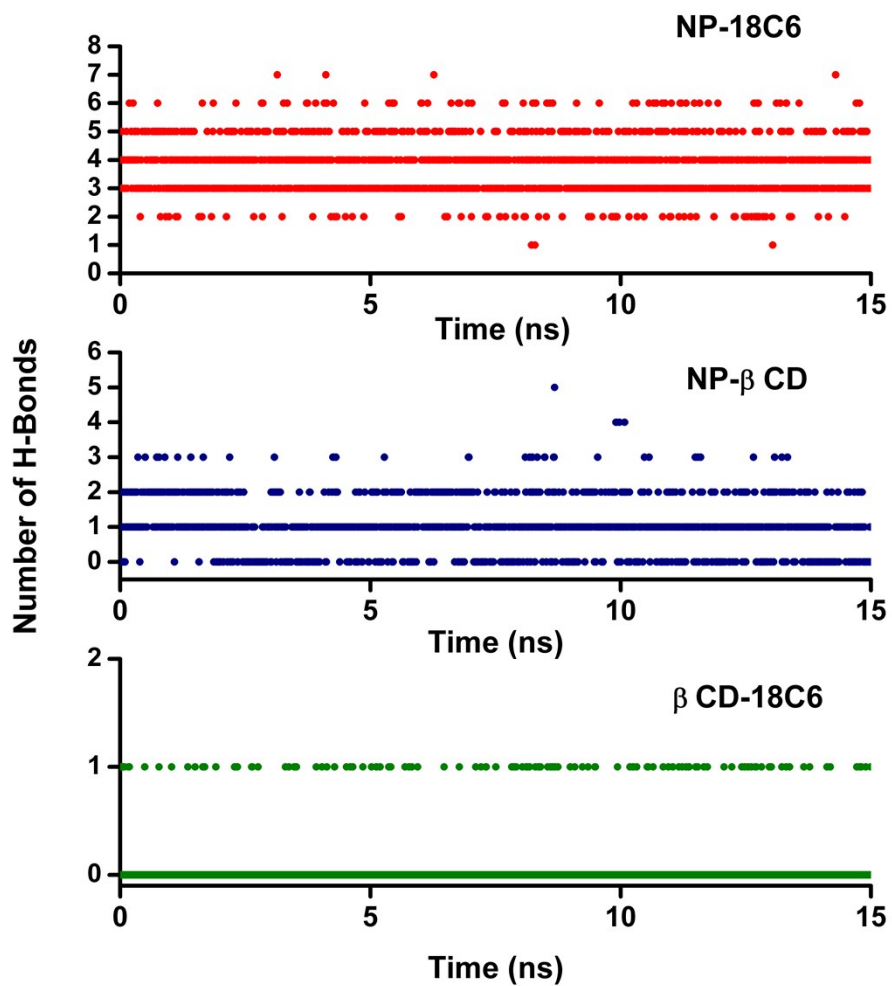

**Figure S6b** Hydrogen bonding interaction obtained from MD trajectories for NP- $\beta$ CD-18C6 complex.

(c) NP- $\beta$ CD-CB7 (NP-Face  $\beta$ CD)

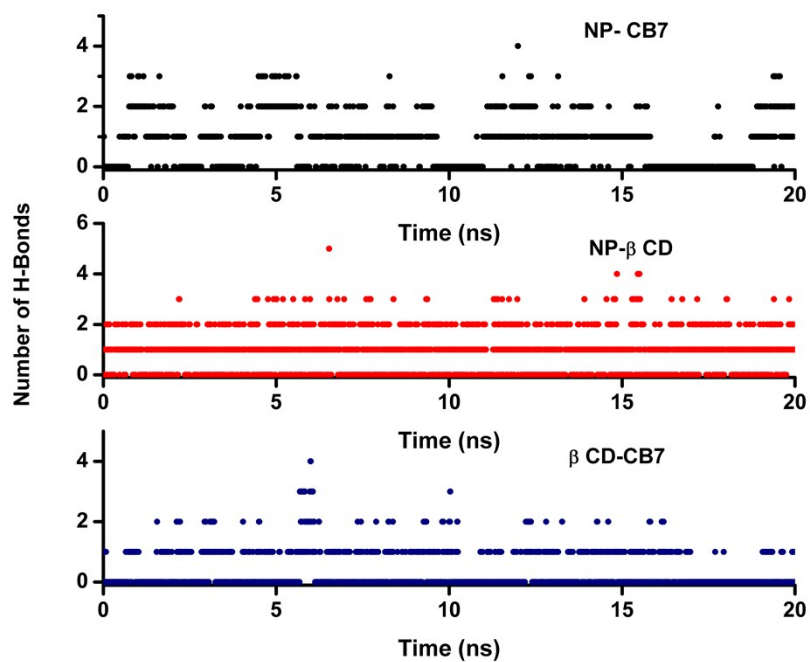

**Figure S6c** Hydrogen bonding interaction obtained from MD trajectories for NP- $\beta$ CD-CB7 complex.

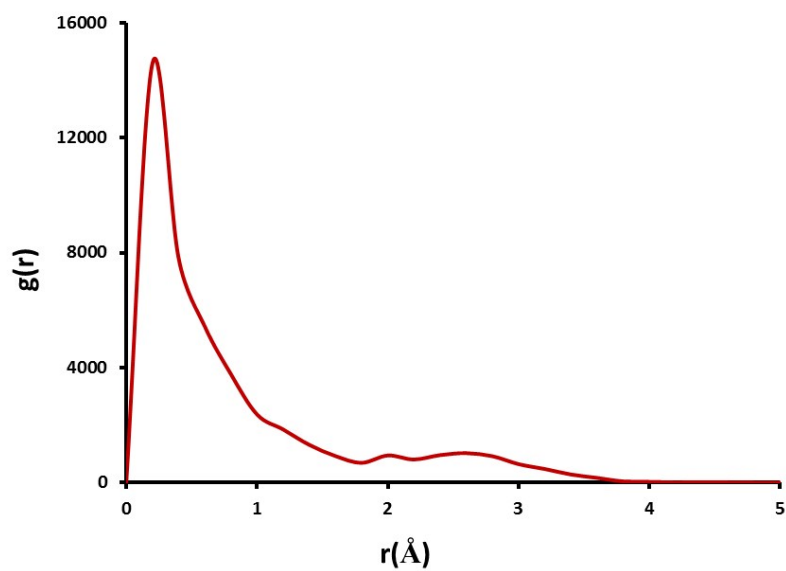

**Figure S7** The RDF of center of mass of host and guest plotted as a function of separation distance  $r$  (Å) in NP- $\beta$ CD complex.

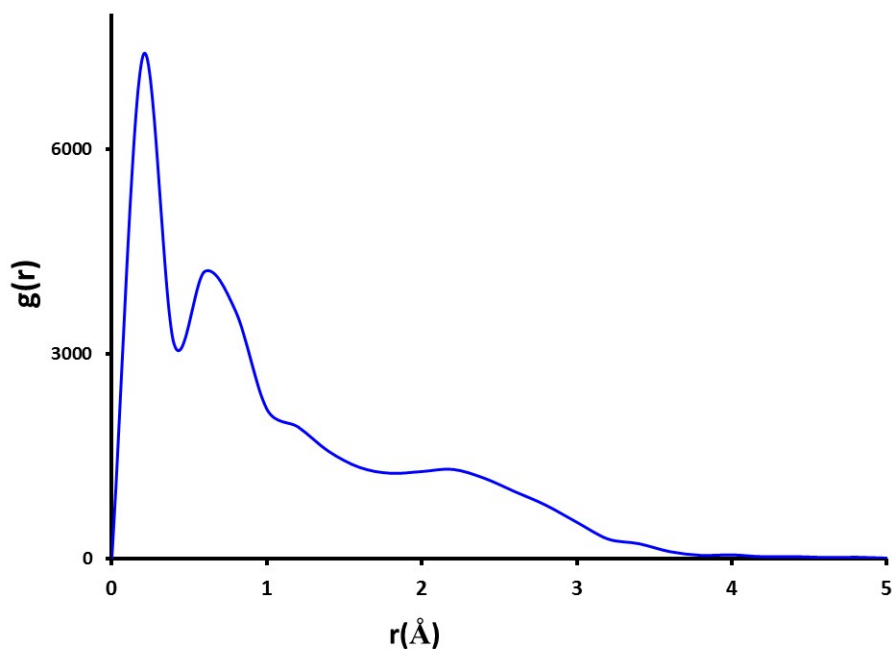

**Figure S8** The RDF of center of mass of  $\beta$ CD and NP plotted as a function of separation distance  $r$  (Å) in NP- $\beta$ CD-18C6 complex.

(a)

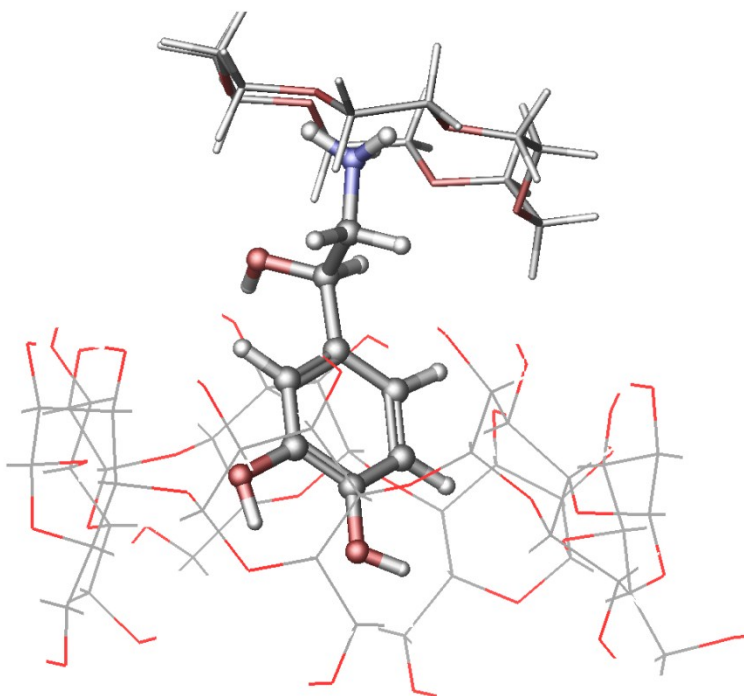

(b)

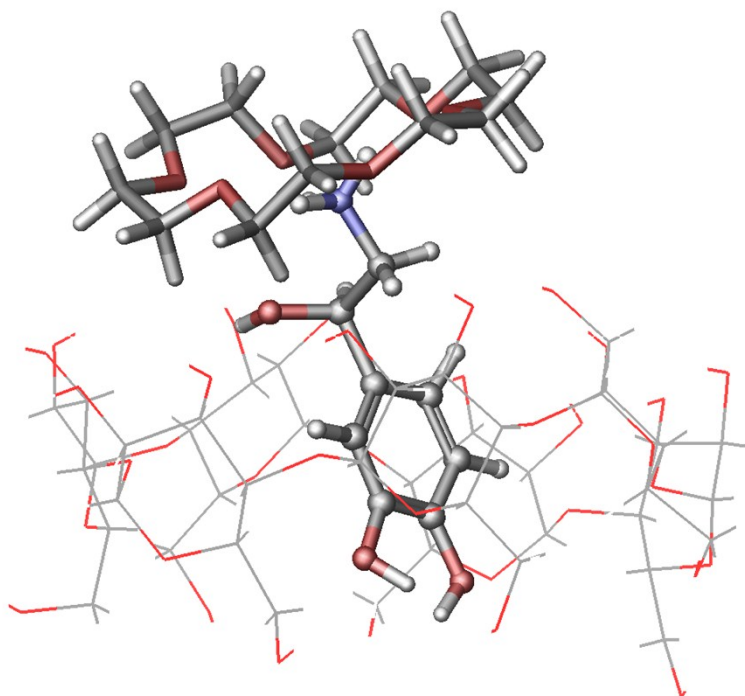

(c)

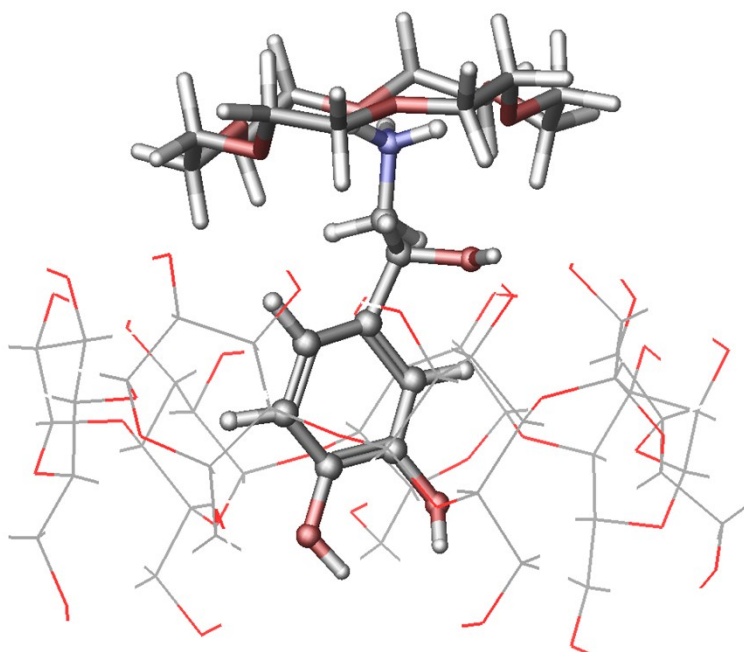

**Figure S9** Snapshots of NP-βCD-18C6 complex taken from the simulation at (a) 5 ns (b) 10 ns (c) 13 ns.
